# Supplementary material
Source: PubMed Central journal article supplement (PMC7042071)
Supplement: NIHMS1542839-supplement-1.pdf [file NIHMS1542839-supplement-1.pdf]

Table S1. Frequency of observed donor-recipient pair cause of ESKD agreement

| Donor Diagnosis          | Recipient Diagnosis |     |     |        |            |       |         |         | Total |
|--------------------------|---------------------|-----|-----|--------|------------|-------|---------|---------|-------|
|                          | Diabetes            | HTN | GN  | Cystic | Urological | Other | Unknown | Missing |       |
| Diabetes                 | 12                  | 6   | 21  | 3      | 1          | 2     | 4       | 0       | 49    |
| Hypertension/HTN         | 14                  | 24  | 32  | 3      | 2          | 9     | 10      | 1       | 95    |
| Glomerulonephritis/GN    | 10                  | 17  | 29  | 0      | 2          | 5     | 4       | 0       | 67    |
| Cystic Kidney Disease    | 1                   | 0   | 0   | 0      | 0          | 1     | 0       | 0       | 2     |
| Other Urological Disease | 1                   | 0   | 2   | 0      | 0          | 1     | 2       | 0       | 6     |
| Other Cause              | 21                  | 18  | 37  | 4      | 1          | 12    | 11      | 0       | 104   |
| Unknown Cause            | 0                   | 4   | 5   | 0      | 0          | 4     | 2       | 0       | 15    |
| Missing Cause            | 16                  | 13  | 23  | 5      | 0          | 5     | 7       | 0       | 69    |
| Total                    | 75                  | 82  | 149 | 15     | 6          | 39    | 40      | 1       | 407   |

The *kappa* statistic assessing the concordance of donor-recipient causes of ESKD diagnosis was 0.04 (slight), however this was statistically significantly different from zero ( $p=0.02$ ). The expected agreement was 15.84% compared with the observed 19.4%.

Table S2. Kappa statistics for biologically related, spousal, non-spousal unrelated

| Donor-recipient relationship pairs | ESKD Diagnosis Concordance |          |       |         |
|------------------------------------|----------------------------|----------|-------|---------|
|                                    | Observed                   | Expected | K     | P-value |
| Biologically related               | 20.5%                      | 16.3%    | 0.05  | 0.01    |
| Spousal relationship               | 16.0%                      | 12.5%    | 0.04  | 0.3     |
| Nonspousal biologically unrelated  | 11.8%                      | 13.1%    | -0.01 | 0.6     |

There is no agreement among non-spousal biologically unrelated pairs ( $\kappa < 0$ ), there is slight agreement among those with a spousal relationship ( $\kappa$  0-0.2) but this agreement is not statistically significant. Similarly, there is slight agreement among biologically related pairs and this slight agreement is statistically significant ( $p=0.01$ ).
